# Supplementary material
Source: Royal Society of Chemistry journal article supplement (doi:10.1039/d5cc06795b)
Supplement: d5cc06795b1.pdf [file d5cc06795b1.pdf]

**Electronic Supplementary Information (ESI):**

**Biomass-derived components to platform chemicals using  
heterogeneous redox catalysts: An overview**

*K. V. Athira, N. P. Nimisha and A. Sakthivel\**

*Inorganic Materials & Heterogeneous Catalysis Laboratory, Department of Chemistry,  
School of Physical Sciences, Sabarmati Building, Tejawini Hills,  
Central University of Kerala, Kasaragod - 671316, Kerala, India.*

*\*Email: [sakthiveldu@gmail.com](mailto:sakthiveldu@gmail.com) / [sakthivelcuk@cukerala.ac.in](mailto:sakthivelcuk@cukerala.ac.in)*

*ORCID information: <https://orcid.org/0000-0003-2330-5192>*

**Table S1.** Oxidation of HMF to FDCA over different supported catalysts

| Catalysts                                    | Reaction Conditions |                                   |       |                                 | HMF<br>Conv.<br>(%) | FDCA<br>Yield<br>(%) | Ref. |
|----------------------------------------------|---------------------|-----------------------------------|-------|---------------------------------|---------------------|----------------------|------|
|                                              | T<br>(°C)           | Oxidant                           | t (h) | Base                            |                     |                      |      |
| Au <sub>8</sub> -Pd <sub>2</sub> /AC         | 60                  | O <sub>2</sub> , 3 bar            | 4     | NaOH                            | >99.0               | >98.0                | 1    |
| Pt/ $\gamma$ -Al <sub>2</sub> O <sub>3</sub> | 140                 | O <sub>2</sub> , 1 bar            | 12    | Na <sub>2</sub> CO <sub>3</sub> | 96.0                | 96.0                 | 2    |
| Au-Pd/CNT                                    | 100                 | O <sub>2</sub> , 5 bar            | 12    | *                               | 100.0               | 94.0                 | 3    |
| Ru/CTF                                       | 140                 | Air, 20 bar                       | 1     | *                               | 99.9                | 37.7                 | 4    |
| Ru/C                                         | 120                 | O <sub>2</sub> , 2 bar            | 10    | *                               | 100                 | 88.8                 | 5    |
| Ru(4%)/MnCo <sub>2</sub> O <sub>4</sub>      | 120                 | Air, 24 bar                       | 10    | *                               | 100                 | 99.1                 | 6    |
| Au/TiO <sub>2</sub>                          | 130                 | Air, 10 bar                       | 8     | NaOH                            | 100                 | 84                   | 7    |
| Ru/AC                                        | 75                  | 35% H <sub>2</sub> O <sub>2</sub> | 6     | Na <sub>2</sub> CO <sub>3</sub> | 100                 | 91.3                 | 8    |
| Pt/ZrO <sub>2</sub>                          | 100                 | O <sub>2</sub> , 4 bar            | 12    | *                               | 100                 | 97.3                 | 9    |

HMF: 5-hydroxymethylfurfural, FDCA: 2,5-furandicarboxylic acid, \*: Base free conditions

## REFERENCES

1. A. Villa, M. Schiavoni, S. Campisi, G.M. Veith, and L. Prati, *ChemSusChem*, 2013, **6**, 609.
2. R. Sahu and P. L. Dhepe, *React. Kinet., Mech. Catal.*, 2014, **112**, 173.
3. X. Wan, C. Zhou, J. Chen, W. Deng, Q. Zhang, Y. Yang and Y. Wang, *ACS Catal.*, 2014, **4**, 2175.
4. J. Artz, and R. Palkovits, *ChemSusChem*, 2015, **8**, 3832.
5. G. Yi, S. P. Teong and Y. Zhang, *Green Chem.*, 2016, **18**, 979.
6. D. K. Mishra, H. J. Lee, J. Kim, H. S. Lee, J. K. Cho, Y.W. Suh, Y. Yi and Y.J. Kim, *Green Chem.*, 2017, **19**, 1619.
7. O. Casanova, S. Iborra and A. Corma, *ChemSusChem*, 2009, **2**, 1138.
8. C.-T. Chen, C. Van Nguyen, Z.-Y. Wang, Y. Bando, Y. Yamauchi, M. T. S. Bazziz, A. Fatehmulla, W. A. Farooq, T. Yoshikawa, T. Masuda and K. C.-W. Wu, *ChemCatChem*, 2018, **10**, 361.

9. H. Chen, J. Shen, K. Chen, Y. Qin, X. Lu, P. Ouyang and J. Fu, *Appl. Catal., A*, 2018, **555**, 98.
